# Supplementary material for: Molecular Characterization of Tinospora cordifolia (Willd.) Miers Using Novel g-SSR Markers and Their Comparison with EST-SSR and SCoT Markers for Genetic Diversity Study
Source: MDPI journal article supplement (doi:10.3390/genes13112042), 2022-11-05
Supplement: s1 [file s1]

Table S1. Details of g-SSR primers used for characterization 28 *Tinospora* accessions

| S. N. | Primer    | Forward Primer Sequence (5'-3') | Reverse Primer Sequence (5'-3') | Repeat Motif                   | Ta (°C) | Expected Product Size in (bp) | NCBI Accession numbers |
|-------|-----------|---------------------------------|---------------------------------|--------------------------------|---------|-------------------------------|------------------------|
| 1     | Tcgssr1   | CTTCGCTCTACCGCCTCAT             | AGCTTCGGATCCACGTTACA            | (GTT)2                         | 52      | 103bp                         | -                      |
| 2     | Tcgssr2*  | TTCTGCGCACAGAGAGAGA             | TTCAGTGAACGACTCCAACG            | (GA)10..(AG)8                  | 52      | 241bp                         | KT384120               |
| 3     | Tcgssr3*  | TTGCTGGTGTGTGTGAGAGA            | TTCATTGCTTTGTGCAGTCC            | (AG)21                         | 52      | 205bp                         | KT384121               |
| 4     | Tcgssr4*  | TGGAGCACTTTGACAGAGCA            | AGATGTCAATCATGCCACCA            | (GTG)2CA(GTG)2                 | 51.6    | 211bp                         | -                      |
| 5     | Tcgssr5   | CCAGCTTCTCCACTTCTTCG            | TATGGGTGCGTCAAAACAGA            | (CA)4AAC(CA)2                  | 53      | 153bp                         | KT384122               |
| 6     | Tcgssr6*  | CCCAAGCTTCGCATCCTAT             | ATCGGAACGACAAGTTCGAC            | (TTTT)6                        | 50      | 216bp                         | -                      |
| 7     | Tcgssr7*  | CAAGCTTCGGATCGTTTGAT            | CGCAAAGGAAGAAGAGGAAA            | (CAG)2..(CAG)3                 | 50.3    | 163bp                         | -                      |
| 8     | Tcgssr8   | GAGCTGCACCCAAACAATTT            | GCATAGGAATTCGGGGGTAT            | (AG)3..(AG)2                   | 51.6    | 182bp                         | -                      |
| 9     | Tcgssr9*  | AGATGTCAATCATGCCACCA            | TGGAGCACTTTGACAGAGCA            | (ACAAC)2                       | 52      | 211bp                         | -                      |
| 10    | Tcgssr10* | AGAAAAGTAGGCCGCGAGTA            | CTTCGGATCGGTGGATTCT             | (AC)3                          | 50      | 182bp                         | -                      |
| 11    | Tcgssr11  | GCTTCGAATCAAGGCATGAA            | CCCAAGCTTCGCATCTTTA             | (GT)4                          | 50      | 150bp                         | -                      |
| 12    | Tcgssr12* | CTCAATGAGAGGGGGTTCAA            | AGGTATATTTGGCGCTTGGA            | (CCTA)3                        | 50      | 220bp                         | -                      |
| 13    | Tcgssr13* | CCAAGCTTCGCATCAATTCT            | GGATGAGCTTTTGACGAAGG            | (CTT)3                         | 50      | 174bp                         | -                      |
| 14    | Tcgssr14* | TATGGGTGCGTCAAAACAGA            | CCAGCTTCTCCACTTCTTCG            | (GAA)3(CTA)3(GAA)2             | 52      | 153bp                         | -                      |
| 15    | Tcgssr15* | TTGGGGATTTTGAGAGATTTG           | CCGCATAATACTAATGAGCAAGG         | (TGA)2G(TGA)2G(TGA)<br>2       | 52      | 150bp                         | KT384123               |
| 16    | Tcgssr16  | GAACAGGGGATTCGAAACAG            | GGATGCGCTCTCCTTTGTTA            | (TTC)3                         | 50      | 155bp                         | -                      |
| 17    | Tcgssr17* | AATTGGGAGAGAGAGAGAGAG           | TTCTGCGTCCCTCCCTCT              | (GA)25                         | 53      | 239bp                         | KT384124               |
| 18    | Tcgssr18* | CGTGACACGAGAGAGAGAGAG           | GCAACTCCGACGCTTTTTTC            | (GA)26                         | 53      | 228bp                         | KT384125               |
| 19    | Tcgssr19  | TCCTCCAAAATCATCGGAAG            | GAGAGAGCTCACGTTTTGG             | (AAC)2AAT(AAC)2                | 52      | 194bp                         | -                      |
| 20    | Tcgssr20* | TTCTACTCCTTCGCCTCCA             | CACCAATCCACCATTTTTTC            | (CT)18                         | 52      | 171bp                         | KT384126               |
| 21    | Tcgssr21* | TCAGACGAGAAACGAGCGTA            | TCTTCACATTCGACGCAGAC            | (AG)24                         | 51.6    | 193bp                         | KT384128               |
| 22    | Tcgssr22* | GAGGTTGTCCACCACTTA              | TTGATCCACTATGCGACCTG            | (AAAA)4                        | 52      | 234bp                         | -                      |
| 23    | Tcgssr23* | ACCCAAGCTTCGCTAATTT             | ACGTGTGTCGCTCAATCAAC            | (GAGGT)3                       | 52      | 151bp                         | -                      |
| 24    | Tcgssr24* | GCTTCGGACCTATTCCTCT             | CAGCTTAACCTGCAACACCA            | (CTCT)4                        | 50      | 183bp                         | -                      |
| 25    | Tcgssr25  | GCGCAAGAAGACGGTAACA             | GCTGCTGAGACGAGTTGTTG            | (AAC)9(AAC)4AG<br>(CAA)9(CAG)5 | 53      | 154bp                         | KT384129               |
| 26    | Tcgssr26  | AGCGATCGTGTTGCACTTA             | ATCAGCCACCACATTCACCT            | (TATA)2                        | 52      | 199bp                         | -                      |
| 27    | Tcgssr27* | GCTGTTGGGCAGTTCTTAGC            | ACGAAATGGAAATGGGAATG            | (CT)4..(CTCT)4                 | 52      | 177bp                         | -                      |
| 28    | Tcgssr28* | CCATCTCACTGTGCGTGTCT            | GCACGAGTGTGTGTGTGTA             | (TC)16                         | 53      | 215bp                         | KT384130               |
| 29    | Tcgssr29  | GACCCAAGCTTCGCTAAAT             | ATGCAAAAACGCAGATAGGG            | (GAA)3..(GAA)2                 | 53      | 215bp                         | -                      |

|    |           |                               |                            |                            |      |       |          |
|----|-----------|-------------------------------|----------------------------|----------------------------|------|-------|----------|
| 30 | Tcgssr30* | TCTGATGTGTGTTGCGTGAA          | GCTCCTTCCTTCATCATTCG       | (TGC)2(TG)3(TGC)3(TG)<br>3 | 53   | 161bp | KT384131 |
| 31 | Tcgssr31* | TTGCTGTGCATCAATACCAAC         | TGCAAAACACAACCACAACA       | (GTGT)5                    | 52   | 185bp | KT384132 |
| 32 | Tcgssr32* | AGCTCCCTCTCTCACGAAT           | GTGCGAGATAAAGAGAGAAACTG    | (TC)14                     | 52   | 190bp | KT384133 |
| 33 | Tcgssr33* | CGTGGTTTCTCGCAGCTCT           | CAAGCTTCGCTACGAGAGAGA      | (CT)8...(CT)7; (TC)7       | 52   | 348bp | -        |
| 34 | Tcgssr34* | TGCAGTCTCTCGTCGCTCT           | GCAAGAGAGAGCTTGCCAAA       | (CT)6                      | 52   | 241bp | -        |
| 35 | Tcgssr35* | GCCTATCGGCGTAACAACAT          | AAGGCAGACACGGTCTTAGA       | (CTGCTG)4...(TC)4          | 52   | 234bp | KT384135 |
| 36 | Tcgssr36* | CGATCCGAAGGCTGTGATTA          | TGTGCTGAAATCTTGCCAAA       | (AAAA)N                    | 52   | 194bp | KT384136 |
| 37 | Tcgssr37  | TGTTGCATGTTTGAGGCATT          | GCCCTGGTTCTTTCTTCCTT       | (AAAA)N                    | 52   | 227   | KT384137 |
| 38 | Tcgssr38* | AATGAACGCCAGCAACCTAC          | GCATAGCAAGGCAGGGTAAG       | (AAAA)N                    | 52   | 154bp | KT384138 |
| 39 | Tcgssr39* | ACCGCAGTCACACTCACAAC          | GACAGGCATAGGGCAATGAT       | (AGAG)N                    | 52   | 237bp | KT384139 |
| 40 | Tcgssr40* | GATGCGATCGAGGTTTATCC          | GAAATTGGCTTGAATTGGA        | (AAAA)N                    | 51.6 | 152bp | KT384140 |
| 41 | Tcgssr41  | CAACCCCAGTAGTCAAGGA           | TTCAGCGAAATAGGCTTGCT       | (AAAA)N                    | 52   | 235bp | KT384141 |
| 42 | Tcgssr42* | GAGAGTTGCTGCCCTAGCTG          | CCTTTCCTTAGGCGCAAAAT       | (CTT)4...(CTT)2            | 52   | 178bp | KT384142 |
| 43 | Tcgssr43* | CAACGTGTTCTACCACACA           | GGGTCACGATATCGGAAGAA       | (TCTC)N...(TCTCTC)N        | 52   | 176bp | KT384143 |
| 44 | Tcgssr44  | TATTCGCCCTTTCATTTTT           | GCATATTGGGCACTGCTTCT       | (A)10...(A)8...(A)4        | 52   | 208bp | KT384144 |
| 45 | Tcgssr45  | AAACAAAAGGTCACAAATCATCA       | ATGACGCACAGCCTAATTGA       | (AAT)5                     | 52   | 152bp | KT384145 |
| 46 | Tcgssr46* | TCAATGAAGAACAGGGGAGA          | CACACCAGCAGCTGCATAAC       | (GT)5                      | 52   | 153bp | KT384147 |
| 47 | Tcgssr47* | AAGTTCAGGGAGGAGGTGT           | TTTGGGACGCAAAGTTTTCT       | (CA)13A(AC)13A(AC)14       | 50.3 | 177bp | KT384148 |
| 48 | Tcgssr48* | AGAACCCAGCAGTGATTTGC          | TGCCTACGGGCTAGATCAAC       | (AAAA)4                    | 51.6 | 203bp | KT384149 |
| 49 | Tcgssr49* | GATGAAATCCCAGGACGAT           | CCCCAAGCATAGGAAATTAGC      | (AAAA)n(A)7                | 52   | 163bp | KT384150 |
| 50 | Tcgssr50* | TTCGGGCAAAGATGAATAGG          | GCAGCTGCATAACCCAGAAT       | (GT)5                      | 51.6 | 209bp | KT384151 |
| 51 | Tcgssr51* | GGACATATGGCCAAGGACTG          | TCAATGGCAAACACTCTTGC       | (AAC)11GA(CAA)10           | 52   | 236bp | KT384091 |
| 52 | Tcgssr52* | TAGGGACACCAGAGGCCAAAT         | ACCTTTGACAGCCGAAGTTG       | (AAC)22                    | 52   | 248bp | KT384092 |
| 53 | Tcgssr53* | ACCGTCTCCATGCTTTTT GA         | AAC ACA TAG CTT ATG CAA CA | (GT)16                     | 49   | 206bp | KT384168 |
| 54 | Tcgssr54* | CATGTGCTCGTGTGTGTGTG          | CGCGTGCTTCTCTCTCTCT        | (GT)9...(AG)31             | 51.6 | 100bp | KT384084 |
| 55 | Tcgssr55* | TCTCTCTCTCTCTGTGAGAT<br>GTAAA | TCTTCGGTCTCTCCCTCTCC       | (CT)12CA(CT)15             | 53   | 167bp | KT384087 |
| 56 | Tcgssr56* | AATCTCTCTCTCTCTCTCT           | GTCCTCCCTCTTTCTCTGC        | (CT)12CA(CT)15             | 53   | 147bp | KT384087 |
| 57 | Tcgssr57* | GGTTGGATCGTCTTGATTCC          | AACCATTGCAAGTTCTTCAAAA     | (CT)23                     | 53   | 151bp | KT384088 |
| 58 | Tcgssr58* | AGAGAGAGAGAGAGAGAGAGA         | CCA GTA CAC CCA CGT CAC TG | (GA)29                     | 50.3 | 175bp | KT384099 |
| 59 | Tcgssr59  | TAGTCCCTTCGCCAATTGAT          | CCC TCT CTC TCA GCC CTC TA | (GA)5...(GA)7...(GA)5      | 50.3 | 168bp | KT384110 |
| 60 | Tcgssr60* | ATTCTCGTCGACCGATTCTG          | TTTTGACACACAGCACACACA      | (GA)15                     | 51.6 | 195bp | KT384114 |

|    |           |                              |                                |                     |      |       |          |
|----|-----------|------------------------------|--------------------------------|---------------------|------|-------|----------|
| 61 | Tcgssr61  | CAAATCTTGAGCGCAAACACT        | TTGTAAGTGGTAATTAAGTGGGTTT<br>T | (AG)28              | 50.3 | 163bp | KT384116 |
| 62 | Tcgssr62* | TTGCCTAATAATGGCTGCAA         | CTCTTGCTTACGCGTGGACT           | (CA)3CC(CA)2A(CA)16 | 49   | 100bp | -        |
| 63 | Tcgssr63* | TCCCATGTATCCTCCCCTTC         | GACACGAACCAAGGATATAAGC         | (GT)5..(GT)8        | 53   | 152bp | KT384160 |
| 64 | Tcgssr64* | GAAAAACCAGTTGAGAGAG<br>AGAGA | TGTCCATTCTTTAAGCGTCA           | (GA)25              | 51.6 | 152bp | KT384107 |
| 65 | Tcgssr65  | TGGGAAGTGTTCATCAAATG         | TTCAAAAAGAAGACTTAGTTGTCTC<br>G | (CT)27 CC (CT)9     | 49   | 214bp | KT384083 |

---

\*Polymorphic markers

**Table S2.** Major allele frequency, Allele number, Gene diversity, Heterozygosity and PIC generated by 49 g-SSR in 28 *Tinospora* accessions

| Marker   | Major Allele Frequency | Allele No | Gene Diversity | Heterozygosity | PIC    |
|----------|------------------------|-----------|----------------|----------------|--------|
| Tcgssr17 | 0.463                  | 4         | 0.6173         | 0.8519         | 0.5399 |
| Tcgssr23 | 0.4783                 | 3         | 0.6115         | 0.913          | 0.5321 |
| Tcgssr14 | 0.5357                 | 3         | 0.574          | 0.9286         | 0.4913 |
| Tcgssr56 | 0.4821                 | 3         | 0.5759         | 0.9643         | 0.4839 |
| Tcgssr20 | 0.5357                 | 3         | 0.5644         | 0.8571         | 0.4769 |
| Tcgssr57 | 0.5192                 | 3         | 0.5614         | 0.9615         | 0.4683 |
| Tcgssr39 | 0.5179                 | 3         | 0.5453         | 0.9643         | 0.4442 |
| Tcgssr15 | 0.5556                 | 4         | 0.5384         | 0.8889         | 0.4435 |
| Tcgssr40 | 0.5577                 | 3         | 0.5377         | 0.8846         | 0.4426 |
| Tcgssr62 | 0.6071                 | 3         | 0.523          | 0.6786         | 0.442  |
| Tcgssr13 | 0.6087                 | 3         | 0.5189         | 0.5217         | 0.4361 |
| Tcgssr64 | 0.5000                 | 3         | 0.5397         | 0.913          | 0.4338 |
| Tcgssr55 | 0.5000                 | 3         | 0.5368         | 1.000          | 0.4295 |
| Tcgssr4  | 0.4815                 | 3         | 0.535          | 0.963          | 0.4262 |
| Tcgssr31 | 0.5893                 | 3         | 0.5108         | 0.8214         | 0.4119 |
| Tcgssr54 | 0.5217                 | 3         | 0.5189         | 0.8696         | 0.405  |
| Tcgssr2  | 0.5000                 | 3         | 0.5185         | 0.9615         | 0.4026 |
| Tcgssr10 | 0.5000                 | 3         | 0.5185         | 0.9231         | 0.4026 |
| Tcgssr49 | 0.5000                 | 3         | 0.5172         | 1.000          | 0.4007 |
| Tcgssr6  | 0.5179                 | 3         | 0.5159         | 0.9643         | 0.4000 |
| Tcgssr33 | 0.5192                 | 2         | 0.4993         | 0.8846         | 0.3746 |
| Tcgssr58 | 0.5217                 | 2         | 0.4991         | 0.6957         | 0.3745 |
| Tcgssr60 | 0.5217                 | 2         | 0.4991         | 0.8696         | 0.3745 |
| Tcgssr52 | 0.5370                 | 2         | 0.4973         | 0.9259         | 0.3736 |
| Tcgssr28 | 0.5577                 | 2         | 0.4933         | 0.8846         | 0.3716 |
| Tcgssr51 | 0.5714                 | 2         | 0.4898         | 0.8571         | 0.3698 |
| Tcgssr9  | 0.5741                 | 2         | 0.489          | 0.8519         | 0.3695 |
| Tcgssr44 | 0.6607                 | 3         | 0.4598         | 0.6786         | 0.3693 |
| Tcgssr34 | 0.5893                 | 2         | 0.4841         | 0.8214         | 0.3669 |
| Tcgssr47 | 0.6042                 | 2         | 0.4783         | 0.7083         | 0.3639 |
| Tcgssr35 | 0.6071                 | 2         | 0.477          | 0.7857         | 0.3633 |
| Tcgssr42 | 0.6071                 | 2         | 0.477          | 0.7857         | 0.3633 |
| Tcgssr63 | 0.6346                 | 2         | 0.4638         | 0.7308         | 0.3562 |
| Tcgssr27 | 0.6429                 | 2         | 0.4592         | 0.7143         | 0.3538 |
| Tcgssr53 | 0.7037                 | 3         | 0.4273         | 0.5185         | 0.3505 |
| Tcgssr50 | 0.7143                 | 2         | 0.4082         | 0.5714         | 0.3249 |
| Tcgssr3  | 0.8036                 | 3         | 0.3221         | 0.3929         | 0.2805 |
| Tcgssr24 | 0.8036                 | 2         | 0.3157         | 0.3929         | 0.2659 |
| Tcgssr12 | 0.8393                 | 2         | 0.2698         | 0.3214         | 0.2334 |
| Tcgssr21 | 0.8929                 | 3         | 0.1964         | 0.2143         | 0.1862 |

|                 |              |              |               |               |               |
|-----------------|--------------|--------------|---------------|---------------|---------------|
| <b>Tcgssr22</b> | 0.9107       | 3            | 0.1652        | 0.1429        | 0.1562        |
| <b>Tcgssr18</b> | 0.9286       | 3            | 0.1352        | 0.1429        | 0.1308        |
| <b>Tcgssr36</b> | 0.9286       | 2            | 0.1327        | 0.1429        | 0.1239        |
| <b>Tcgssr48</b> | 0.9423       | 2            | 0.1087        | 0.1154        | 0.1028        |
| <b>Tcgssr32</b> | 0.9643       | 2            | 0.0689        | 0.0714        | 0.0665        |
| <b>Tcgssr7</b>  | 0.9792       | 2            | 0.0408        | 0.0417        | 0.0400        |
| <b>Tcgssr30</b> | 0.9821       | 2            | 0.0351        | 0.0357        | 0.0345        |
| <b>Tcgssr38</b> | 0.9821       | 2            | 0.0351        | 0.0357        | 0.0345        |
| <b>Tcgssr43</b> | 1.0000       | 1            | 0.0000        | 0.0000        | 0.0000        |
| <b>Mean</b>     | <b>0.653</b> | <b>2.551</b> | <b>0.4144</b> | <b>0.6564</b> | <b>0.3345</b> |

**Table S3.** Major allele frequency, Allele number, Gene diversity, Heterozygosity and PIC generated by 80 EST-SSR in 28 *Tinospora* accessions

| Marker      | Major Allele Frequency | Allele No | Gene Diversity | Heterozygosity | PIC    |
|-------------|------------------------|-----------|----------------|----------------|--------|
| Tcestssr-3  | 0.5714                 | 2.0000    | 0.4898         | 0.8571         | 0.3698 |
| Tcestssr-4  | 0.9286                 | 2.0000    | 0.1327         | 0.0000         | 0.1239 |
| Tcestssr-5  | 0.5769                 | 2.0000    | 0.4882         | 0.8462         | 0.3690 |
| Tcestssr-6  | 0.9464                 | 2.0000    | 0.1014         | 0.0357         | 0.0963 |
| Tcestssr-7  | 0.9643                 | 2.0000    | 0.0689         | 0.0714         | 0.0665 |
| Tcestssr-8  | 0.9444                 | 2.0000    | 0.1049         | 0.1111         | 0.0994 |
| Tcestssr-9  | 0.7679                 | 2.0000    | 0.3565         | 0.4643         | 0.2930 |
| Tcestssr-11 | 0.7143                 | 2.0000    | 0.4082         | 0.5714         | 0.3249 |
| Tcestssr-12 | 0.5179                 | 2.0000    | 0.4994         | 0.9643         | 0.3747 |
| Tcestssr-13 | 0.9600                 | 2.0000    | 0.0768         | 0.0000         | 0.0739 |
| Tcestssr-14 | 0.5357                 | 2.0000    | 0.4974         | 0.9286         | 0.3737 |
| Tcestssr-15 | 0.7200                 | 2.0000    | 0.4032         | 0.5600         | 0.3219 |
| Tcestssr-16 | 0.8600                 | 2.0000    | 0.2408         | 0.0400         | 0.2118 |
| Tcestssr-17 | 0.5357                 | 2.0000    | 0.4974         | 0.7857         | 0.3737 |
| Tcestssr-18 | 0.9200                 | 2.0000    | 0.1472         | 0.1600         | 0.1364 |
| Tcestssr-19 | 0.9000                 | 2.0000    | 0.1800         | 0.2000         | 0.1638 |
| Tcestssr-20 | 0.7143                 | 3.0000    | 0.4177         | 0.5714         | 0.3441 |
| Tcestssr-21 | 0.9107                 | 2.0000    | 0.1626         | 0.1071         | 0.1494 |
| Tcestssr-22 | 0.9286                 | 2.0000    | 0.1327         | 0.0476         | 0.1239 |
| Tcestssr-23 | 0.6875                 | 2.0000    | 0.4297         | 0.6250         | 0.3374 |
| Tcestssr-26 | 0.9643                 | 2.0000    | 0.0689         | 0.0000         | 0.0665 |
| Tcestssr-29 | 0.5536                 | 3.0000    | 0.5364         | 0.8929         | 0.4391 |

|                    |        |        |        |        |        |
|--------------------|--------|--------|--------|--------|--------|
| <b>Tcestssr-30</b> | 0.6481 | 2.0000 | 0.4561 | 0.7037 | 0.3521 |
| <b>Tcestssr-32</b> | 0.8929 | 3.0000 | 0.1971 | 0.2143 | 0.1879 |
| <b>Tcestssr-33</b> | 0.6111 | 2.0000 | 0.4753 | 0.7778 | 0.3623 |
| <b>Tcestssr-34</b> | 0.8929 | 2.0000 | 0.1913 | 0.2143 | 0.1730 |
| <b>Tcestssr-36</b> | 0.5000 | 3.0000 | 0.5800 | 1.0000 | 0.4918 |
| <b>Tcestssr-37</b> | 0.5556 | 2.0000 | 0.4938 | 0.8148 | 0.3719 |
| <b>Tcestssr-38</b> | 0.9423 | 2.0000 | 0.1087 | 0.1154 | 0.1028 |
| <b>Tcestssr-39</b> | 0.9800 | 2.0000 | 0.0392 | 0.0400 | 0.0384 |
| <b>Tcestssr-41</b> | 0.6481 | 2.0000 | 0.4561 | 0.7037 | 0.3521 |
| <b>Tcestssr-42</b> | 0.9815 | 2.0000 | 0.0364 | 0.0370 | 0.0357 |
| <b>Tcestssr-44</b> | 0.5536 | 4.0000 | 0.5886 | 0.6071 | 0.5220 |
| <b>Tcestssr-45</b> | 0.8750 | 2.0000 | 0.2188 | 0.0357 | 0.1948 |
| <b>Tcestssr-46</b> | 0.5000 | 2.0000 | 0.5000 | 0.6667 | 0.3750 |
| <b>Tcestssr-47</b> | 0.5714 | 2.0000 | 0.4898 | 0.8571 | 0.3698 |
| <b>Tcestssr-48</b> | 0.5179 | 2.0000 | 0.4994 | 0.9643 | 0.3747 |
| <b>Tcestssr-49</b> | 0.6786 | 3.0000 | 0.4471 | 0.6429 | 0.3618 |
| <b>Tcestssr-50</b> | 0.6875 | 4.0000 | 0.4627 | 0.4583 | 0.4013 |
| <b>Tcestssr-51</b> | 0.9231 | 2.0000 | 0.1420 | 0.1538 | 0.1319 |
| <b>Tcestssr-52</b> | 0.5000 | 3.0000 | 0.5343 | 1.0000 | 0.4259 |
| <b>Tcestssr-53</b> | 0.5741 | 2.0000 | 0.4890 | 0.7037 | 0.3695 |
| <b>Tcestssr-54</b> | 0.8696 | 2.0000 | 0.2268 | 0.1739 | 0.2011 |
| <b>Tcestssr-55</b> | 0.5536 | 3.0000 | 0.5096 | 0.8929 | 0.3967 |
| <b>Tcestssr-56</b> | 0.6296 | 2.0000 | 0.4664 | 0.7407 | 0.3576 |
| <b>Tcestssr-57</b> | 0.8214 | 2.0000 | 0.2934 | 0.0000 | 0.2503 |
| <b>Tcestssr-58</b> | 0.5185 | 2.0000 | 0.4993 | 0.9630 | 0.3747 |

|                    |        |        |        |        |        |
|--------------------|--------|--------|--------|--------|--------|
| <b>Tcestssr-59</b> | 0.5536 | 3.0000 | 0.5236 | 0.8214 | 0.4190 |
| <b>Tcestssr-60</b> | 0.5179 | 2.0000 | 0.4994 | 0.8929 | 0.3747 |
| <b>Tcestssr-61</b> | 0.7105 | 2.0000 | 0.4114 | 0.5789 | 0.3267 |
| <b>Tcestssr-62</b> | 0.5893 | 2.0000 | 0.4841 | 0.8214 | 0.3669 |
| <b>Tcestssr-63</b> | 0.5000 | 4.0000 | 0.5658 | 0.7778 | 0.4728 |
| <b>Tcestssr-65</b> | 0.5714 | 2.0000 | 0.4898 | 0.8571 | 0.3698 |
| <b>Tcestssr-66</b> | 0.5536 | 2.0000 | 0.4943 | 0.8929 | 0.3721 |
| <b>Tcestssr-68</b> | 0.6200 | 2.0000 | 0.4712 | 0.6800 | 0.3602 |
| <b>Tcestssr-70</b> | 0.4630 | 3.0000 | 0.5919 | 0.8519 | 0.5044 |
| <b>Tcestssr-71</b> | 0.5357 | 2.0000 | 0.4974 | 0.8571 | 0.3737 |
| <b>Tcestssr-72</b> | 0.5370 | 2.0000 | 0.4973 | 0.9259 | 0.3736 |
| <b>Tcestssr-73</b> | 0.8333 | 2.0000 | 0.2778 | 0.0370 | 0.2392 |
| <b>Tcestssr-74</b> | 0.9464 | 2.0000 | 0.1014 | 0.1071 | 0.0963 |
| <b>Tcestssr-75</b> | 0.5000 | 3.0000 | 0.5733 | 0.8571 | 0.4823 |
| <b>Tcestssr-76</b> | 0.5893 | 3.0000 | 0.4981 | 0.8214 | 0.3906 |
| <b>Tcestssr-77</b> | 0.9815 | 2.0000 | 0.0364 | 0.0370 | 0.0357 |
| <b>Tcestssr-78</b> | 0.5000 | 3.0000 | 0.5478 | 1.0000 | 0.4456 |
| <b>Tcestssr-79</b> | 0.5357 | 2.0000 | 0.4974 | 0.9286 | 0.3737 |
| <b>Tcestssr-80</b> | 0.9821 | 2.0000 | 0.0351 | 0.0357 | 0.0345 |
| <b>Tcestssr-81</b> | 0.6964 | 2.0000 | 0.4228 | 0.6071 | 0.3334 |
| <b>Tcestssr-82</b> | 0.5714 | 3.0000 | 0.5045 | 0.8571 | 0.3940 |
| <b>Tcestssr-83</b> | 0.5000 | 3.0000 | 0.5178 | 1.0000 | 0.4016 |
| <b>Tcestssr-84</b> | 0.6071 | 2.0000 | 0.4770 | 0.7857 | 0.3633 |
| <b>Tcestssr-85</b> | 0.4815 | 4.0000 | 0.5521 | 0.8148 | 0.4512 |
| <b>Tcestssr-86</b> | 0.9815 | 2.0000 | 0.0364 | 0.0370 | 0.0357 |



|                    |               |               |               |               |               |
|--------------------|---------------|---------------|---------------|---------------|---------------|
| <b>Tcestssr-87</b> | 0.5357        | 3.0000        | 0.5644        | 0.8214        | 0.4769        |
| <b>Tcestssr-89</b> | 0.5000        | 2.0000        | 0.5000        | 1.0000        | 0.3750        |
| <b>Tcestssr-90</b> | 0.5185        | 2.0000        | 0.4993        | 0.8889        | 0.3747        |
| <b>Tcestssr-91</b> | 0.7407        | 2.0000        | 0.3841        | 0.5185        | 0.3103        |
| <b>Tcestssr-92</b> | 0.9821        | 2.0000        | 0.0351        | 0.0357        | 0.0345        |
| <b>Tcestssr-94</b> | 0.5000        | 3.0000        | 0.5478        | 0.9286        | 0.4456        |
| <b>Tcestssr-95</b> | 0.9821        | 2.0000        | 0.0351        | 0.0357        | 0.0345        |
| <b>Tcestssr-96</b> | 0.6071        | 2.0000        | 0.4770        | 0.7857        | 0.3633        |
| <b>Mean</b>        | <b>0.6972</b> | <b>2.3000</b> | <b>0.3686</b> | <b>0.5527</b> | <b>0.2952</b> |

**Table S4.** Major allele frequency, Allele number, Gene diversity, Heterozygosity and PIC generated by 19 SCoT markers in 28 *Tinospora* accessions

| Marker | Major Allele Frequency | Allele No | Gene Diversity | Heterozygosity | PIC    |
|--------|------------------------|-----------|----------------|----------------|--------|
| SCoT1  | 0.9643                 | 6         | 0.0655         | 0              | 0.0606 |
| SCoT2  | 0.7531                 | 6         | 0.3182         | 0              | 0.2517 |
| SCoT3  | 0.756                  | 7         | 0.2902         | 0              | 0.2316 |
| SCoT4  | 0.9                    | 6         | 0.1778         | 0              | 0.1607 |
| SCoT5  | 0.8571                 | 6         | 0.2041         | 0              | 0.1686 |
| SCoT6  | 0.7143                 | 5         | 0.3327         | 0              | 0.2567 |
| SCoT7  | 0.7407                 | 6         | 0.3356         | 0              | 0.2673 |
| SCoT8  | 0.8741                 | 5         | 0.1679         | 0              | 0.1392 |
| SCoT9  | 0.801                  | 7         | 0.2992         | 0              | 0.2465 |
| SCoT10 | 0.7884                 | 7         | 0.2986         | 0              | 0.2446 |
| SCoT11 | 0.9364                 | 5         | 0.1033         | 0              | 0.0882 |
| SCoT12 | 0.8365                 | 4         | 0.1901         | 0              | 0.1504 |
| SCoT13 | 0.9792                 | 6         | 0.0399         | 0              | 0.0383 |
| SCoT14 | 0.821                  | 5         | 0.2725         | 0              | 0.2276 |
| SCoT15 | 0.6646                 | 7         | 0.39           | 0              | 0.2988 |
| SCoT16 | 0.8636                 | 7         | 0.2037         | 0              | 0.1726 |
| SCoT17 | 0.8299                 | 6         | 0.2643         | 0              | 0.2212 |
| SCoT18 | 0.8571                 | 7         | 0.2279         | 0              | 0.1931 |
| SCoT19 | 0.74                   | 6         | 0.3381         | 0              | 0.2675 |
| Mean   | 0.8251                 | 6         | 0.2379         | 0              | 0.1939 |

**Table S5.** Percentage of variation explained by the first 3 axes among the *Tinospora* accessions by g-SSR, EST-SSR and SCoT markers

| Marker  | Axis | %     | Cum % |
|---------|------|-------|-------|
| g-SSR   | 1    | 16.97 | 16.97 |
|         | 2    | 10.95 | 27.93 |
|         | 3    | 9.44  | 37.37 |
| EST-SSR | 1    | 26.84 | 26.84 |
|         | 2    | 15.51 | 42.34 |
|         | 3    | 8.79  | 51.13 |
| SCoT    | 1    | 26.65 | 26.65 |
|         | 2    | 15.09 | 41.74 |
|         | 3    | 10.88 | 52.62 |
